# Supplementary material for: Health-Promoting or Involuntary? Heterogeneous Effects of Physical Activity Type and Frequency on Depression Among Older Chinese Adults
Source: Research Square preprint supplement (doi:10.21203/rs.3.rs-7155086/v1), 2025-11-28
Supplement: Supplementary file 1 [file e47c86c3a67bbeed9cb9d50a.docx]

**Table S1.** Association Between Physical Activity Frequency and Depression Scores (CES-D10): Results from Multivariate Linear Regression

| Frequency | *β*estimate | std.error | statistic | p.value | conf.low | conf.high |
| --- | --- | --- | --- | --- | --- | --- |
| (Intercept:0 day) | -3.29 | 1.46 | -2.24 | 0.02 | -6.17 | -0.42 |
| Intensive: 1-2days | 0.16 | 0.33 | 0.47 | 0.63 | -0.50 | 0.82 |
| Intensive: 3-4days | 0.36 | 0.33 | 1.08 | 0.27 | -0.29 | 1.02 |
| Intensive: 5-6days | 1.45 | 0.44 | 3.28 | 0.001 | 0.58 | 2.32 |
| Intensive: 7days | 0.53 | 0.26 | 2.04 | 0.04 | 0.02 | 1.05 |
| (Intercept:0 day) | -2.23 | 1.46 | -1.52 | 0.12 | -5.10 | 0.63 |
| Moderate: 1-2days | -0.29 | 0.29 | -1.01 | 0.31 | -0.87 | 0.27 |
| Moderate: 3-4days | 0.22 | 0.28 | 0.79 | 0.42 | -0.32 | 0.78 |
| Moderate: 5-6days | 0.39 | 0.42 | 0.93 | 0.34 | -0.43 | 1.21 |
| Moderate: 7days | -0.43 | 0.20 | -2.18 | 0.02 | -0.83 | -0.04 |
| (Intercept:0 day) | -1.92 | 1.46 | -1.31 | 0.18 | -4.78 | 0.93 |
| Light: 1-2days | 0.29 | 0.40 | 0.73 | 0.46 | -0.49 | 1.08 |
| Light: 3-4days | -0.49 | 0.31 | -1.59 | 0.11 | -1.10 | 0.11 |
| Light: 5-6days | -0.34 | 0.37 | -0.93 | 0.35 | -1.07 | 0.38 |
| Light: 7days | -0.70 | 0.20 | -3.39 | 0.007 | -1.11 | -0.29 |

**Table S2.** Logistic Regression of Physical Activity Frequency on Depression Risk (CES-D ≥10)

| term | OR (Exp(β)) | std.error | statistic | p.value | conf.low | conf.high |
| --- | --- | --- | --- | --- | --- | --- |
| (Intercept) | 0.01 | 0.53 | -8.69 | 3.61 | 0.003 | 0.02 |
| Intensive: 1-2days | 1.12 | 0.11 | 0.98 | 0.32 | 0.89 | 1.41 |
| Intensive: 3-4days | 1.16 | 0.11 | 1.28 | 0.19 | 0.92 | 1.46 |
| Intensive: 5-6days | 1.55 | 0.15 | 2.82 | 0.004 | 1.14 | 2.10 |
| Intensive: 7days | 1.25 | 0.09 | 2.42 | 0.01 | 1.04 | 1.50 |
| (Intercept) | 0.01 | 0.5 | -8.08 | 6.37 | 0.004 | 0.03 |
| Moderate: 1-2days | 0.84 | 0.10 | -1.55 | 0.11 | 0.69 | 1.04 |
| Moderate: 3-4days | 1.16 | 0.09 | 1.52 | 0.12 | 0.95 | 1.41 |
| Moderate: 5-6days | 1.12 | 0.14 | 0.76 | 0.44 | 0.83 | 1.50 |
| Moderate: 7days | 0.92 | 0.07 | -1.10 | 0.26 | 0.80 | 1.06 |
| (Intercept) | 0.01 | 0.53 | -7.96 | 1.68 | 0.005 | 0.04 |
| Light: 1-2days | 1.22 | 0.14 | 1.41 | 0.15 | 0.92 | 1.60 |
| Light: 3-4days | 0.84 | 0.10 | -1.50 | 0.13 | 0.68 | 1.05 |
| Light: 5-6days | 1.05 | 0.13 | 0.38 | 0.70 | 0.81 | 1.36 |
| Light: 7days | 0.87 | 0.07 | -1.76 | 0.04 | 0.76 | 0.98 |

**Table S3:** Linear regression estimates of depressive symptoms stratified by hukou type and IPA purpose.

| term | estimate | std.error | statistic | p.value | conf.low | conf.high |
| --- | --- | --- | --- | --- | --- | --- |
| (Intercept) | -2.86 | 3.20 | -0.89 | 0.37 | -9.14 | 3.43 |
| Purpose_labelEntertainment | 0.17 | 1.07 | 0.16 | 0.87 | -1.93 | 2.27 |
| Purpose_labelExercise | -0.06 | 0.45 | -0.14 | 0.89 | -0.94 | 0.81 |
| hukou_labelUrban | -0.36 | 0.68 | -0.53 | 0.04 | -1.68 | -0.97 |
| age | 0.01 | 0.04 | 0.19 | 0.85 | -0.07 | 0.08 |
| genderFemale | 2.70 | 0.34 | 7.96 | 0.00 | 2.04 | 3.37 |
| healthreport_recode | 4.01 | 0.38 | 10.44 | 0.00 | 3.26 | 4.76 |
| spouseliving_recode | 1.37 | 0.40 | 3.41 | 0.00 | 0.58 | 2.16 |
| yibao_recode | 1.24 | 0.71 | 1.76 | 0.08 | -0.15 | 2.63 |
| Purpose_labelEntertainment:hukou_labelUrban | -1.43 | 1.97 | -0.72 | 0.04 | -5.29 | -2.44 |
| Purpose_labelExercise:hukou_labelUrban | -0.96 | 1.00 | -0.95 | 0.03 | -2.93 | -1.01 |

**Table S4:** Stratified results by spousal cohabitation status, comparing depressive effects of IPA purposes.

| term | estimate | std.error | statistic | p.value | conf.low | conf.high |
| --- | --- | --- | --- | --- | --- | --- |
| (Intercept) | -0.85 | 3.40 | -0.25 | 0.80 | -7.52 | 5.81 |
| Purpose_labelEntertainment | 0.47 | 1.13 | 0.42 | 0.68 | -1.74 | 2.68 |
| Purpose_labelExercise | -0.28 | 0.46 | -0.61 | 0.54 | -1.19 | 0.63 |
| spouseliving_labelLiving Alone | 1.43 | 0.49 | 2.94 | 0.00 | 0.48 | 2.39 |
| age | 0.00 | 0.04 | 0.13 | 0.90 | -0.07 | 0.08 |
| genderFemale | 2.69 | 0.34 | 7.91 | 0.00 | 2.02 | 3.36 |
| healthreport_recode | 4.03 | 0.38 | 10.53 | 0.00 | 3.28 | 4.78 |
| hukou_recode | -0.77 | 0.56 | -1.39 | 0.17 | -1.87 | 0.32 |
| yibao_recode | 1.40 | 0.70 | 2.01 | 0.04 | 0.04 | 2.77 |
| Purpose_labelEntertainment:spouseliving_labelLiving Alone | 0.71 | 1.84 | -0.93 | 0.04 | 1.32 | 1.91 |
| Purpose_labelExercise:spouseliving_labelLiving Alone | 0.88 | 0.89 | 0.20 | 0.01 | 1.57 | 1.93 |

**Table S5:** Regression analysis by medical insurance type, assessing differential effects of work-related versus exercise-related IPA.

| term | estimate | std.error | statistic | p.value | conf.low | conf.high |
| --- | --- | --- | --- | --- | --- | --- |
| (Intercept) | -0.66 | 3.12 | -0.21 | 0.83 | -6.78 | 5.46 |
| Purpose_labelEntertainment | 0.13 | 2.11 | 0.06 | 0.95 | -4.01 | 4.27 |
| Purpose_labelExercise | -0.81 | 1.15 | -0.70 | 0.48 | -3.07 | 1.46 |
| yibao_labelRural Insurance | 1.14 | 0.91 | 1.25 | 0.01 | 0.64 | 2.92 |
| age | 0.01 | 0.04 | 0.15 | 0.88 | -0.07 | 0.08 |
| genderFemale | 2.70 | 0.34 | 7.95 | 0.00 | 2.04 | 3.37 |
| healthreport_recode | 4.02 | 0.38 | 10.46 | 0.00 | 3.26 | 4.77 |
| spouseliving_recode | 1.40 | 0.40 | 3.48 | 0.00 | 0.61 | 2.18 |
| hukou_recode | -0.74 | 0.56 | -1.33 | 0.19 | -1.84 | 0.36 |
| Purpose_labelEntertainment:yibao_labelRural Insurance | -0.43 | 2.33 | -0.19 | 0.03 | -4.99 | -1.13 |
| Purpose_labelExercise:yibao_labelRural Insurance | 0.65 | 1.22 | 0.54 | 0.02 | 1.74 | 3.05 |
